# 1 GLOBAL INEQUITY IN SCIENTIFIC NAMES AND WHO THEY HONOR

2 Shane DuBay<sup>1\*</sup>, Daniela H. Palmer<sup>2\*</sup>, and Natalia Piland<sup>3,4\*</sup>

3 <sup>1</sup> Department of Ecology and Evolutionary Biology and Museum of Zoology, University of  
4 Michigan, Ann Arbor, MI, USA

5 <sup>2</sup> Department of Animal and Plant Sciences, University of Sheffield, Sheffield, UK

6 <sup>3</sup> Committee on Evolutionary Biology, University of Chicago, Chicago, IL, USA

7 <sup>4</sup> Field Museum of Natural History, Chicago, IL, USA

8 \*for correspondence: [dubaysg@umich.edu](mailto:dubaysg@umich.edu), [d.h.palmer@sheffield.ac.uk](mailto:d.h.palmer@sheffield.ac.uk), [npiland@uchicago.edu](mailto:npiland@uchicago.edu)

9 **KEY WORDS:** birds, colonialism, eponyms, global North, global South, imperialism, inequity,  
10 power structures, taxonomy, Western science

## 11 ABSTRACT

12 Linnaean taxonomy is a cornerstone of Western biology in which organisms are given a two-  
13 part name (a genus and species), creating biological units that help us order and manage our  
14 knowledge of the living world. In this system, the names of species themselves take on  
15 additional functions, such as describing features of the organism or honoring individuals (known  
16 as eponyms). Here, we interrogate how power and authority over the natural world are claimed  
17 through Western scientific naming practices to evaluate the legacies of imperialism,  
18 dispossession, and exclusion in these practices. We compile and analyze a dataset of all bird  
19 species descriptions from 1950 to present, asking: who has access and power to name species,  
20 and who is honored in species names? We show that 95% of newly described species are  
21 described from the global South, but the majority of species and eponyms are described by  
22 authors, and named after individuals, from the global North. We find an increase through time in  
23 authors from the global South, which is associated with a rise in eponyms that honor individuals  
24 from global South countries. However, this formal inclusion of global South authors has not  
25 translated into increases in first authorship (a primary form of credit and authority in Western  
26 science). We contextualize these disparities in naming and authorship within broader global  
27 structures of access and power put in place through centuries of European and U.S.  
28 imperialism, but a historical perspective alone ignores institutional and individual agency and  
29 incentives in present-day actions. As we increasingly reflect on the social foundations and  
30 impacts of our science, these findings show how research and labor in the global South  
31 continue to be disproportionately translated into power and authority in the global North,  
32 upholding and re-enacting imperial structures of domination.

33 *For working definitions of key terms, see the Definitions Box at the end of the text. For Spanish*  
34 *language version of the manuscript, see Supplement (para la versión en español ver*  
35 *Suplemento).*

## 36 INTRODUCTION

37 The act of naming and ordering the living world cuts across cultures and language, and is an  
38 integral part of how we make sense of the world around us (Brown 1984, Atran 1998, Berlin  
39 2014). By naming and classifying organisms, we build a foundation for understanding their  
40 biology, which has enabled scientists to study variation and diversity (Darwin 1859), define  
41 biological units to conserve (Mace and Lande 1990, Myers et al. 2002), and commodify or  
42 extirpate species (Weinstein 1983, Bucher 1992, Diamond 2002, Cronon 2009). The world as  
43 we know it is a direct result of our ability to name and catalog the natural world.

44 In 1735, Carl Linnaeus codified a binomial system of taxonomy, which has since  
45 become a cornerstone of Western biology and biodiversity science (Linnaeus 1735). While the  
46 primary function of Linnaean taxonomy is to document and organize knowledge of the living  
47 world, the names of species themselves take on additional functions, such as describing  
48 features of the organism (like where it is found or what it looks like), or honoring individuals. For  
49 example, in 2017, a new bird species was described from an outlying ridge of the Peruvian  
50 Andes. The bird was given the scientific name *Myrmoderus eowilsoni* in honor of the “Father of  
51 Biodiversity” – Edward O. Wilson (Moncrieff et al. 2018). In response, Wilson said that, “the idea  
52 of [having] a bird named after you is right up there with maybe the Nobel [Prize], because it’s  
53 such a rarity to have a true new species discovered, and I do take it as a great personal honor”  
54 (Rainforest Trust 2017). As Wilson notes, descriptions of birds new to Western science have  
55 become rare events in the last 70 years (Figure 1A), and being the inspiration for a new species  
56 name is widely considered a great honor.

57 How a bird from the Peruvian Andes comes to be named after E.O. Wilson, a naturalist from the  
58 Southern U.S., can only be understood through a historical lens and by considering the societal  
59 interests and global structures put in place during centuries of European and U.S. imperialism  
60 (Richardson 2018). This history of European and U.S. conquest is inextricably tied to the  
61 enterprise of Western science. For example, critical advances in malaria research were funded  
62 and motivated by efforts in the late 19th century to curb European deaths in British colonies  
63 (Deb Roy 2013, 2018), and in 1902, Sir Ronald Ross received a Nobel Prize in Medicine for his  
64 work on the transmission of malaria, having argued that, “in the coming century, the success of  
65 imperialism will depend largely upon success with the microscope” (*Science* 1900). As historian  
66 Rohan Deb Roy writes, “[Ross] point neatly summarised how the efforts of British scientists  
67 were intertwined with their country’s attempt to conquer a quarter of the world” (Deb Roy 2018).

68 The reliance of Western science on imperial ventures (and vice versa) is probably best  
69 catalogued in the links between naturalists and slave trade, prospecting and resource  
70 extraction, and European exploration of the 18th and 19th centuries (Kean 2019, Wynn-Grant  
71 2019). The impacts of these naturalists on present-day science are difficult to overstate; the  
72 voyages of naturalists like Charles Darwin on the *Beagle* and Sir Joseph Banks on the  
73 *Endeavour* were integral parts of an imperial enterprise (MacKenzie 1990, Carter 1995).

74 Imperialism granted Western scientists unprecedented access to the world, which they  
75 translated into scientific authority, power, and wealth, fueling narratives of white supremacy,  
76 while simultaneously disregarding (or appropriating) Indigenous knowledge. These narratives  
77 were used in turn to justify genocide, coercive labor, and exploitation, enabling the flow of  
78 material wealth and intellectual resources from colonized lands to metropolises (Galeano 1971,  
79 Said 1979). In settler colonial states, like the U.S., nation-building relied on European colonial  
80 and imperialist infrastructure for global access (e.g. Quintero Toro 2012). As a result, Western  
81 science is conducted through the same institutions and methods that thrived under and helped  
82 constitute European imperialism. Within this context, we can understand how species from  
83 formerly or currently colonized parts of the world (usually referred to as the “global South”) come  
84 to be described by, and named after, scientists from former or current imperial metropolises, or  
85 the “global North”.

86 In this study, we interrogate the ways in which imperialism and exclusion underlie modern  
87 scientific naming practices. We compile and analyze a dataset of species descriptions and their  
88 authors to ask: who has access and power to name species, and who is honored in species  
89 names? We focus our analysis on descriptions of birds because of their broad scientific and  
90 cultural relevance (e.g. Schuetz and Johnston 2019, Robinson 2019). We also limit our analysis  
91 to after 1950, when the opportunity to name new bird species becomes rare (Figure 1A), further  
92 intensifying the potential for recognition of authors and honorees with new descriptions. We find  
93 that global patterns of naming and authorship, extending into the present, are consistent with  
94 the historical exploitation of intellectual and material goods in the global South (Galeano 1971),  
95 and advance scientific authority in the global North, as expertise about the natural world  
96 continues to be disproportionately claimed by the global North. Our findings serve as a case  
97 study of the disparities that exist at the core of biological science. The implications of this study  
98 extend beyond inequity in naming practices and taxonomy, which is a facet of how biodiversity  
99 science is done in a global context. This study is a broader reflection on the inequitable  
100 structures that underlie Western scientific practices – inequities in access, labor, collaboration,  
101 power, and designations of expertise and authority. Our intention for this work is not to discredit  
102 the accomplishments of others, but rather provide context and promote conversations in our  
103 scientific communities that acknowledge and confront inequities in our practices.

## 104 **RESULTS**

105 Since 1950, 95% of new bird species have been described from countries in the global South (n  
106 = 367 of 385). During this period, only 17 species have been described from the global North  
107 (one species had an undetermined geographic placement). We classified countries and island  
108 regions as either global North or global South –here and throughout the study– based on the  
109 United Nations classifications for “developed” and “developing” regions  
110 (<https://unstats.un.org/unsd/methodology/m49/>), with “developed” corresponding to the global  
111 North, and “developing” corresponding to the global South (Rigg 2007). Since 1950, species

112 have been described from 68 countries (Figure 2), but half of all species have been described  
113 from five global South countries alone: Brazil (n = 68), Peru (n = 57), Colombia (n = 25),  
114 Philippines (n = 23), and Indonesia (n = 20). Hereafter, we refer to the country where a species  
115 was described from as its *type locality*.

116 Half of all species were named after people (50%, n = 193), like *Myrmoderus eowilsoni*. This  
117 type of species name is known as an eponym. The other half of species were named after  
118 defining characteristics (50%, n = 192), like morphological features, behavior, or where it is  
119 found, like *Pyrrhura peruviana*. Over time the number of eponyms increases ( $R^2 = 0.141$ ,  $p =$   
120  $0.001$ ) as the other naming categories remain steady ( $R^2 = 0.011$ ,  $p = 0.379$ ; Figure 1B).

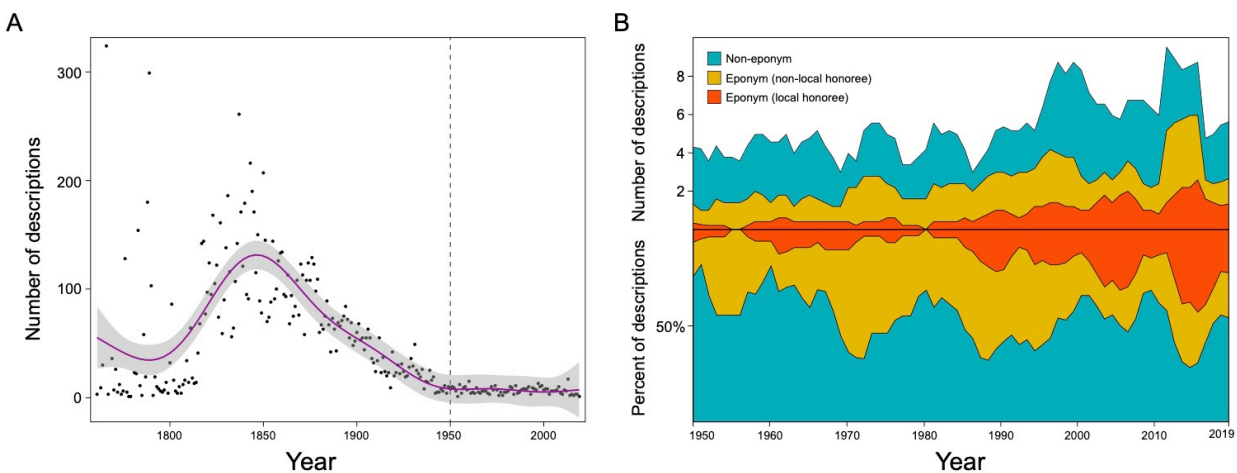

**Figure 1.** The number of bird species descriptions through time. (A) The number of descriptions by year that follow Linnaean taxonomy, starting after 1758, when Carl Linnaeus initially described 554 birds in the 10th edition of *Systema Naturae* (Linnaeus 1758). The purple line is a LOESS regression with 95% confidence intervals (shaded gray area). The dotted vertical line marks the point in time at which the dataset for this study begins, once the magnitude of species descriptions bottoms out in the mid-twentieth century. (B) The total number (top) and percent (bottom) of descriptions split by naming category from 1950 to present, plotted as a five-year moving average. Species names that honor individuals (eponyms) are divided into two categories: eponyms that honor individuals from the country where the bird was described (local honoree), and eponyms that honor individuals from somewhere other than the country where the bird was described (non-local honoree). We binned all species names that are not eponyms (e.g. morphonyms, toponyms, etc.) into the third grouping (Non-eponym).

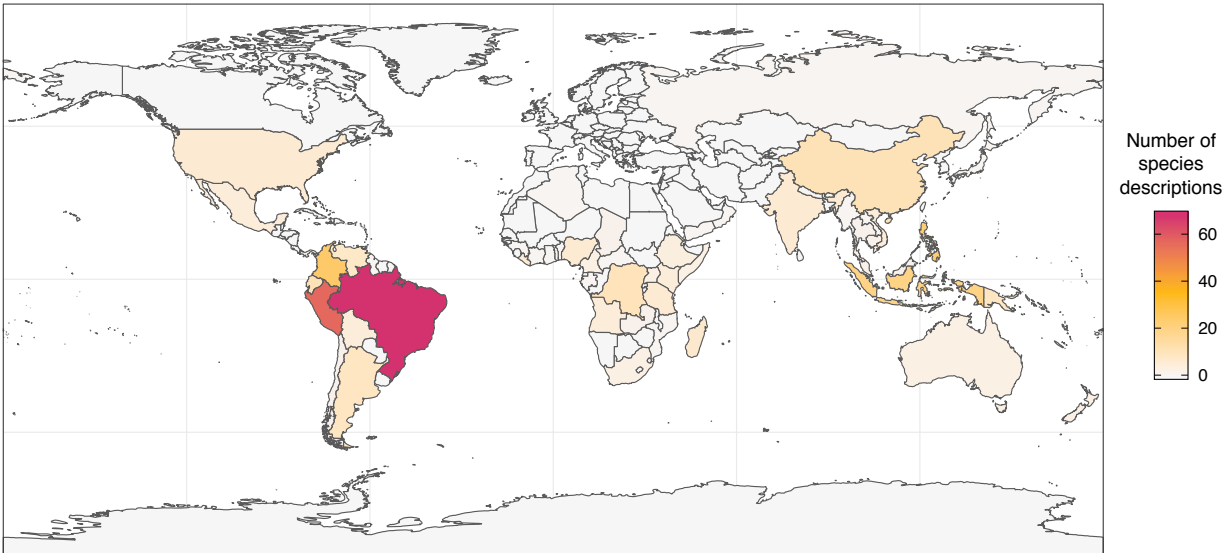

121

**Figure 2.** The number of bird species described from a given country from 1950 to 2019.

## 122 **Who has access and power to name species?**

123 Over the last 70 years, 545 individuals authored 385 species descriptions, filling a total of 1012  
124 author positions (descriptions have anywhere from 1 to 16 authors). We compiled data on  
125 where each author was from to infer where an author received their formative education  
126 (hereafter, referred to as their *country of origin*). Using publicly available sources, we inferred an  
127 author's country of origin from a combination of where they were born and where they received  
128 an undergraduate education (details of this method are discussed in the Methods). We were  
129 able to compile data for 76% of all authors ( $n = 412$  of 545) and for 84% of total author positions  
130 ( $n = 848$  of 1012). Of these authors, 62% ( $n = 255$ ) are from the global North and 38% ( $n = 157$ )  
131 are from the global South. We also recorded the institutional affiliation (at the time of the species  
132 description) for 98% of total author positions, which shows a similar pattern: 60% of authors  
133 were affiliated with institutions in the global North ( $n = 595$ ), and 40% were affiliated with  
134 institutions in the global South ( $n = 393$ ). These results show that the majority of authors are  
135 from the global North and affiliated with global North institutions.

136 When we consider that 24% ( $n = 133$  of 545) of authors have missing country of origin data in  
137 our dataset, our results likely underestimate the percentage of authors from the global North,  
138 which suggests that the geographic skew in authorship is more extreme. This dynamic can be  
139 understood when we assess individuals in the dataset with known birthplace and institutional  
140 affiliations (which accounts for 59% of authors): 72% ( $n = 236$ ) of authors were born in the same  
141 country as the institutions where they worked, and 7% ( $n = 23$ ) of authors were born in the  
142 same country as at least one of the institutions where they worked (i.e. these 23 authors were  
143 affiliated with multiple institutions in different countries). Of the remaining 21% of authors ( $n =$

144 67) who were born in a country that was different from the institutions where they worked, this  
145 movement was largely within the global North (33%,  $n = 22$ ) or from the global North to global  
146 South institutions (49%,  $n = 33$ ). We documented one instance of movement within the global  
147 South, and only 16% of authors ( $n = 11$ ) who shifted countries moved from the global South to  
148 global North institutions. Given the much higher prevalence of movement within the global North  
149 and from the global North to global South institutions, these data suggest that the percent of  
150 authors whose country of origin is in the global North should be higher than the percent of  
151 authors whose institutional affiliation (for which our dataset is 98% complete) is in the global  
152 North.

### 153 *First authors, author lists, and authority*

154 In the biological sciences, the first author on a publication typically receives the most credit for  
155 the work, and this author is viewed as a primary authority on a publication's contents  
156 (Tschardt et al. 2007, Shen and Barabási 2014). We therefore examined metrics for first  
157 authors to explore who is perceived by the scientific community as the authority on a species  
158 description. We found that 71% of first authors ( $n = 275$ ) are from the global North, and 21% ( $n$   
159  $= 82$ ) are from the global South. The country of origin for 7% of first authors ( $n = 28$ ) was  
160 unknown. In 55% of the cases where the first author is from the global South ( $n = 45$ ), all  
161 authors on the description are from the global South. The first author's country of origin was  
162 different from the species' type locality for 72% of species descriptions ( $n = 276$ ), and the same  
163 for 22% of species descriptions ( $n = 85$ ). The first author's country of origin was unknown for the  
164 remaining 6% of descriptions ( $n = 24$ ) (for one description the species' type locality was  
165 unknown). The prevalence of first authors from the global South increases significantly toward  
166 the present ( $R^2 = 0.143$ ,  $p = 0.014$ ), but the prevalence of first authors from the global North  
167 remains consistent ( $R^2 = 6.749e-5$ ,  $p = 0.947$ ) and is always higher (Figure 3A).

168 When we looked at institutional affiliation, 70% of first authors ( $n = 268$ ) were affiliated with  
169 institutions in the global North, 27% of first authors ( $n = 104$ ) were affiliated with institutions in  
170 the global South, and the institutional affiliation was unknown for 3% of first authors ( $n = 13$ ).  
171 Similar to the authors' country of origin patterns, the prevalence of first authors from global  
172 South institutions increases significantly toward the present ( $R^2 = 0.142$ ,  $p = 0.007$ ), but the  
173 prevalence of first authors from global North institutions remains consistent ( $R^2 = 0.018$ ,  $p =$   
174  $0.282$ ) and is always higher (Figure 3B). Taken together, these data show that the perceived  
175 authorities on species described from the global South are largely scientists from the global  
176 North.

177 We found an increase (though non-significant) through time in the percent of species  
178 descriptions for which the first author's country of origin is the same as the species' type locality  
179 ( $R^2 = 0.053$ ,  $p = 0.137$ ; Figure 3C). However, for most descriptions, the first author's country of  
180 origin was different from the species' type locality (Figure 3C,E). In fact, for 51% of descriptions  
181 ( $n = 195$ ), not a single author was from the species' type locality. For 39% ( $n = 149$ ) of

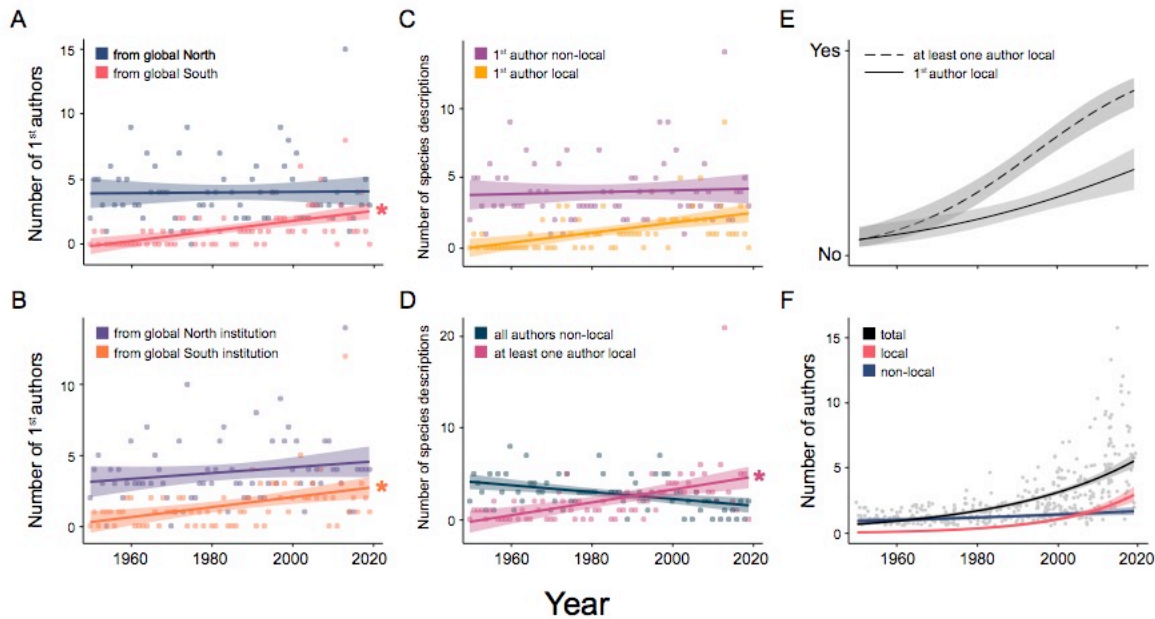

**Figure 3.** Authors' country of origin and institutional affiliation through time. (A) The number of first authors for a given year whose country of origin is in the global North vs. global South. (B) The number of first authors for a given year whose institutional affiliation is in the global North vs. global South. (C) The number of species descriptions for a given year in which the first author's country of origin is the same as the species' type locality (1st author local) or different (1st author non-local). (D) The number of species descriptions for a given year in which at least one author is from the species' type locality (at least one author local) vs. when not a single author is from the species' type locality (all authors non-local). In panels A-D, (\*) denote significant changes ( $p < 0.05$ ) in the response variable through time from simple linear models. Each point is the number of descriptions in a given year for each category. (E) Logistic regressions of the data from panels C (solid line) and D (dotted line), showing changes through time in whether or not species descriptions have local first authors or at least one local author. (F) The total number of authors on a description (total), and the number of authors on a description in which an authors' country of origin is the same (local) or different (non-local) from the species' type locality. Lines plot Poisson regressions. Each gray point is the number of authors on each species description. For all panels, shaded areas are 95% confidence intervals for each regression.

182 descriptions at least one author was from the species' type locality, and this information was  
 183 unknown for the remaining 11% of descriptions ( $n = 41$ ). Toward the present, however, we  
 184 found a significant increase in descriptions that include at least one author from the species'  
 185 type locality ( $R^2 = 0.189$ ,  $p = 0.002$ ), and a near-significant decrease in descriptions without a  
 186 single author from the species' type locality ( $R^2 = 0.056$ ,  $p = 0.068$ ; Figure 3D), resulting in a  
 187 pattern inversion in the 1990s (Figure 3E). That is, before 1990, most author lists were  
 188 exclusively non-local, while after 1990, most author lists included at least one author from the  
 189 species' type locality (Figure 3D,E).

190 When we look at the entire author list for a species description, the number of authors increases  
191 significantly toward the present (GLM:  $\chi^2 = 292.54$ ,  $p < 0.001$ ; Figure 3F), which appears to be  
192 driven by the addition of authors from the global South (Figure 3F), rather than changes in the  
193 number of authors from the global North, which remains relatively stable through time (Figure  
194 3F). This result reflects a significant increase toward the present in the percent of authors  
195 whose country of origin matches the species' type locality (GLM:  $\chi^2 = 187.96$ ,  $p < 0.001$ ; Figure  
196 3F).

### 197 *Journals and the language of species descriptions*

198 We found that 85% of species descriptions are published in journals based in the global North  
199 ( $n = 329$ ); 13% of descriptions are published in journals based in the global South ( $n = 51$ ), and  
200 five descriptions are published in journals with unknown geographic placement. We also  
201 determined the language of each description based on its title. We found that 70% of  
202 descriptions are published in journals that are based in countries where English is recognized  
203 as an official language ( $n = 268$ ), but 82% of descriptions are written in English ( $n = 316$ ). This  
204 excess of English-language descriptions consists of 57 descriptions written in English that are  
205 published in journals based in countries where English is not an official language. The other  
206 languages of species descriptions are: Portuguese ( $n = 20$ ), French ( $n = 18$ ), German ( $n = 14$ ),  
207 Spanish ( $n = 9$ ), Russian ( $n = 1$ ), and Vietnamese ( $n = 1$ ). We were unable to classify language  
208 for six species descriptions.

### 209 **Who is honored in species names?**

210 Of the species named after a single person ( $n = 183$ ), the type locality for 96% of these species  
211 are in the global South, but the majority of these eponyms are named in honor of individuals  
212 from the global North: 68% ( $n = 124$ ) of eponyms honor individuals from the global North, while  
213 30% ( $n = 54$ ) honor individuals from the global South. The honoree's country of origin was  
214 unknown for 5 eponyms. Looking at the countries from where each bird was described, only  
215 31% ( $n = 56$ ) of eponyms honor individuals from the species' type locality, while 67% ( $n = 122$ )  
216 of eponyms honor individuals from a different country. Additional eponyms are named after  
217 fictional characters, honorific titles, or have unknown etymology ( $n=7$ ), or are named after  
218 groups of people ( $n = 8$ ), of which three are named after indigenous groups from the region  
219 where the species occurs. Although the majority of eponyms honor individuals from the global  
220 North, we found an increase toward the present in eponyms that honor local individuals – i.e.  
221 from the global South ( $R^2 = 0.242$ ,  $p < 0.001$ ; Figure 1B).

### 222 *Impacts of an author's country of origin on eponym patterns*

223 When the first author's country of origin is consistent with the species' type locality, the species  
224 is 62% more likely to be named in honor of someone from that country (GLM:  $\chi^2 = 18.68$ ,  $p <$   
225  $0.001$ ; Figure 4). Regardless of first authorship, however, if there is at least one author whose



226 country of origin matches the species' type locality, then the species is 47% more likely to be  
227 named in honor of someone from that country (GLM:  $\chi^2 = 21.88$ ,  $p < 0.001$ ; Figure 4).

## 228 Gender disparity in eponyms

229 Based on the Latin endings of species names, we also assessed gender designations for  
230 individuals honored in eponyms (-ae = woman, -i = man, -orum = group of women/men or group  
231 of all men, -arum = group of women). The Latin language and the codes that manage Linnaean  
232 taxonomy impose binary gender designations for eponym names (ICZN Article 31.1.2 [animals],  
233 ICNafp Article 60.8 [plants], ICNB Appendix 9 [bacteria]). This practice reflects gendered rules  
234 and language that have governed Linnaean taxonomy for almost three centuries, and  
235 consequently erase the identities of nonbinary individuals, while also imposing gender identities.  
236 Of the eponyms that are named after a single individual ( $n = 183$ ), 81% ( $n = 149$ ) honor men,  
237 and 19% ( $n = 34$ ) honor women. The observed gender disparity in eponyms is also paired with  
238 disparities in how authors characterize honorees within the text of species descriptions. For  
239 example, men who are honored are often described as *colleagues* and *friends*, *notable*  
240 *scientists*, and *patrons*, while half of all eponyms that honor women describe these women as  
241 *wives* ( $n = 13$ ) and *daughters* ( $n = 4$ ). To put these differences into perspective, only one male  
242 honoree is characterized as a son, and not a single male honoree is characterized as a  
243 husband. The observed gender disparity in who is honored as a source of knowledge is itself a  
244 manifestation of the epistemic sexism/racism that defines Western science as a colonial and  
245 imperial project (Grosfoguel 2013). This disparity is further reflected in the fact that 59% ( $n = 20$ )  
246 of eponyms that honor women use only their given name, while 12% ( $n = 4$ ) use given name  
247 and surname, and 29% ( $n = 10$ ) use only surname. In contrast, only 1% ( $n = 2$ ) of eponyms that  
248 honor men use only their given name, while 2% ( $n = 3$ ) use given name and surname, and 97%  
249 ( $n = 144$ ) use only surname.

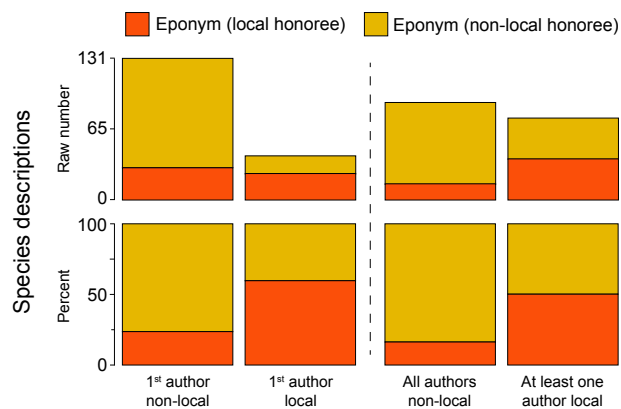

**Figure 4.** Eponym patterns based on an author's country of origin, comparing eponyms that honor individuals from the country where the bird was described (local honoree), and eponyms that honor individuals from somewhere other than the country where the bird was described (non-local honoree). The four author classifications follow the classifications in Figure 3B,E. The top plots show the raw number of species descriptions in each category. The bottom plots show the percent of species descriptions in that category.

## 250 **DISCUSSION**

251 Our results show how foundational practices in Western science still adhere to global structures  
252 of access and power that disproportionately benefit the global North. As professional scientists  
253 from the global North who are affiliated with global North institutions, we (the authors) have had  
254 access to funding and career opportunities in science that are the product of the wealth  
255 amassed through a history of genocide, coercive labor, land seizure, and resource extraction by  
256 the U.S. and Britain (e.g. see Jordan et al. 2018; please see our statement of Land  
257 Acknowledgement below). We recognize that our affiliations with global North institutions have  
258 provided us with largely unrestricted access to work in the global South. As our findings  
259 highlight, this access to the global South continues to be translated into scientific authority,  
260 power, and material wealth (e.g. in the form of careers) in the global North. While we can  
261 understand this dynamic by examining the global structures of access and power put in place  
262 during centuries of European and U.S. imperialism, a historical perspective alone ignores the  
263 agency of institutions and scientists in present-day actions. By ignoring the inequities embedded  
264 in Western science, we re-enact and uphold structures of domination and imperialism in our  
265 research practices.

### 266 **Inclusion, access, and power within Western science**

267 The patterns of authorship we observed show that researchers from the global South have  
268 increasing access to Western science (Figure 3), which appears to impact naming outcomes  
269 (see Figure 4). We see an increase through time in the number of authors on a description,  
270 which is driven almost exclusively by an increase in authors from the global South (Figure 3F).  
271 This formal inclusion of global South authors, however, does not broadly translate into Western  
272 metrics of primary authority, like first authorship (compare the differences between Figure 3C  
273 and D). As a result, Western scientific authority continues to be consolidated in the global North.  
274 The increase in global South authors tracks the efforts in recent years by global North  
275 institutions to expand participation in Western science (Mervis 2016, Valentine et al. 2016), and  
276 also tracks the recent increase in international collaborations (Coccia and Bozeman 2016).  
277 These two academic trends have been motivated by a model in which diversity and inclusion  
278 equal better science, higher rankings, and increased marketability (Iwasaki 2019, Henderson  
279 and Herring 2013, Berrey 2011). These initiatives, however, are documented to be largely  
280 symbolic, utilizing labor and collaborations to serve academic markets in the global North and  
281 legitimize authority and dominance structures already in place (Ahmed 2017, Khan et al. 2019,  
282 Henry et al. 2017). This model of inclusion and collaboration prioritizes the global North's power  
283 to theorize and conceptualize (e.g. the scientist that extrapolates the observation of an  
284 individual bird to the *naming of a full species*), while relying on the global South to connect the  
285 work to the material world (e.g. the local guide/resident/scientist who facilitates the physical  
286 work to *find the individual bird*) (Alvarez and Coolsaet 2020). Furthermore, this model of  
287 inclusion frames the value of people and their perspectives in terms of how they can benefit  
288 those currently in power, without challenging those power structures (e.g. Johnson 2020).

289 An example that illustrates how Western science allows inclusion insofar as power structures  
290 are maintained is the expectation of professional English as its language. English is the  
291 linguistic currency of Western science, placing the burden of inclusion on the person seeking  
292 inclusion, e.g. a non-native English speaker from the global South. This expectation of English  
293 is highlighted in our dataset, for example, in the higher percentage of descriptions written in  
294 English (82%) than the percentage of descriptions published in journals based in English-  
295 speaking countries (70%). Getting to the point where a non-native English speaker can write a  
296 species description assumes not only that the researcher has something to write about (e.g. a  
297 bird), but that the researcher has had access to English classes and/or English-speaking  
298 colleagues/contacts/editing services, by way of financial means, time, a global social network, or  
299 institutional support. In contrast, scientists from English-speaking countries already know the  
300 language of Western science.

301 It is essential to acknowledge that this study looks at knowledge production, access, and power  
302 within Western naming practices *from the perspective of the global North*. Implicit in this  
303 perspective is that first authorship, and authorship of publications in general, are ways to  
304 establish authority and accumulate power in knowledge production, which in itself is worth  
305 questioning. For example, how do established authorship norms promote inequity and  
306 dominance in Western science (e.g. Pender and Shaw 2020, Ward-Fear et al. 2020)?  
307 Furthermore, while our work examines dynamics between the global North and South within a  
308 Western context, these dynamics are mirrored in broader structures of dominance between  
309 Western science and Indigenous science (as defined by Ogawa 1995). The imperial dynamics  
310 that created the current structures of access and power within Western science between the  
311 global North and South have also enabled Western science to assert dominance in global  
312 knowledge production (de Sousa Santos 2018, Manathunga 2020), while erasing, appropriating,  
313 and subjugating Indigenous knowledge and authority. Solutions to build a more equitable global  
314 scientific community –if that is in fact our goal within Western institutions– will ultimately require  
315 actions that redress current structures of dominance and authority built on a history of  
316 dispossession, violence, and white supremacy.

### 317 **The consequences of upholding imperial structures of power and authority**

318 The observed disparities in eponyms and authorship raise ethical and practical questions about  
319 how science is done in a global context. For example, what does it mean for power and  
320 authority over the natural world to be disproportionately claimed by the global North (Meneghini  
321 et al. 2008, Mori et al. 2015, Espin et al. 2017)? What are the consequences for a community's  
322 relationship to the environment when scientific authority over that environment is held/claimed  
323 by individuals outside of the local community (Mammides et al. 2016, de Vos 2020)? What does  
324 it mean for work in the global South to be translated and consolidated into authority, prestige,  
325 and careers in the global North? Our intention here is not to prescribe particular answers to the  
326 above questions because the formulations of those answers will require dialogue between the

327 hegemonic communities in which we are embedded and those excluded and marginalized by  
328 them. Rather, our goal for this paper is to promote conversations and actions around these  
329 questions, and contribute to the work already being done within and outside the academy that  
330 re-frames approaches to science to confront inequity in present-day practices (for examples of  
331 recent work see Maile 2015 and <https://decolonize-dna.org>), while acknowledging our collective  
332 agency in these practices (Perrotta and Alonso 2020). As an entry point for these conversations,  
333 we recommend working through the questions in the Research Justice Worksheet found at:

334 <https://freerads.org/wp-content/uploads/2020/06/research-justice-worksheet-with-refs.pdf>

335 We have found this resource helpful for personal reflection and group discussion (thanks,  
336 Supriya). We recognize that these questions may be uncomfortable and even painful for some  
337 (as they have been for us). We invite and challenge you to work through this discomfort.

338 Linnaean taxonomy reflects a social history and practice that continues to consolidate authority  
339 in the global North under the guise of scientific objectivity. As we grapple with the questions  
340 above as a global community, Western science must give up the fallacy of presenting itself as  
341 *neutral* and *objective* (Latour and Woolgar 1979, Proctor 1991, Harding 1992, Sheth 2019,  
342 Alves 2020), which remains a dominant tenet of training and discourse to this day. As  
343 sociologist William Jamal Richardson reminds us, “[we] can’t understand the production of  
344 knowledge and science independent of its relationship to societal interests and structures of  
345 power” (Frickel and Moore 2015, Richardson 2018). Adhering to the fallacy of neutrality (which  
346 is in fact a non-neutral stance and one embedded in white supremacy; Grosfoguel 2013,  
347 Prescod-Weinstein 2015, Saini 2019) has allowed scientists to ignore the social impacts of our  
348 actions past and present, while upholding global and institutional structures of dominance and  
349 inequity, regardless of intent.

## 350 **METHODS**

### 351 **Dataset**

352 As our base dataset, we used the Birdlife International global avian checklist, which is regarded  
353 as a dominant authority in avian taxonomy (HBW and BirdLife Taxonomic Checklist v4 Dec  
354 2019). Importantly, this checklist includes information on the authors and year of each species’  
355 description. For entries from 1950 to present, we removed taxa that are currently recognized as  
356 species but were originally described as subspecies. We identified these entries by looking at  
357 the original species/subspecies description for each entry. Removing these taxa ensures that  
358 the level of honor at which a taxon is described is consistent between entries. Additionally, we  
359 added in taxa for which the opposite scenario is true – that is, we included taxa that were  
360 originally described as species following Linnaean taxonomy but are not currently recognized as  
361 species by the BirdLife International checklist committee. We included these “invalid” species in

362 the dataset because they were originally described with the intention of being at the species  
363 level. We identified these taxa using *Bird Species New to Science: Fifty Years of Avian*  
364 *Discoveries* (Brewer 2018), which reports a comprehensive list of taxa described as species  
365 between 1960 and 2015. For taxa described as species between 2015 and 2019, we conducted  
366 a literature search to identify recently described species to include in the dataset. Lastly, we did  
367 not include descriptions in which the species was extinct at the time of description. Figure 1A  
368 includes all (and only) entries from the HBW and BirdLife Taxonomic Checklist v4, but for all  
369 subsequent figures and analyses, subspecies and extinct taxa were removed, and “invalid”  
370 species were included.

### 371 **Type localities, species name categories, and etymology of eponyms**

372 We defined a species’ type locality as the country from where the species was described, which  
373 we determined from locality data associated with holotype specimens.

374 We classified species names based on their meaning and derivation, placing each species into  
375 one of nine naming categories defined in the *Helm Dictionary of Scientific Bird Names* (Jobling  
376 2010). The categories include: (1) eponym – named after a person or persons; (2) morphonym  
377 – named after morphological characteristics, like plumage; (3) toponym – named in reference to  
378 a geographic place; (4) autochthonym – named in an indigenous language; (5) taxonym –  
379 named in relation to other taxa; (6) bionym – named after habitat or environmental conditions;  
380 (7) ergonym – named after behavioral characteristics, like breeding or display behaviors; (8)  
381 phagonym – named after diet or prey type; and (9) phononym – named after vocal  
382 characteristics.

383 We further divided eponyms into five categories: (1) local – named after an individual from the  
384 species’ type locality; (2) non-local – named after an individual from a country other than the  
385 species’ type locality; (3) fictional – named after a fictional character; (4) titles – named after an  
386 honorific title, like Prince; and (5) group – named after a group of people. To determine if an  
387 eponym was local or non-local, we had to first infer where an honoree was from, which we  
388 defined as the country where they were born, and determined using *The Eponym Dictionary of*  
389 *Birds* (Beolens et al. 2014). For example, the entry for Maria Koepcke says, “born Maria Emilia  
390 Ana von Milkulicz-Radecki in Leipzig, Germany,” and the entry for Alfonso Maria Olalla says,  
391 “an Ecuadorian professional collector, who lived in Brazil (mid-1930s) and took Brazilian  
392 citizenship.” We recorded the countries where they were from as Germany and Ecuador,  
393 respectively. For individuals who lack this information in *The Eponym Dictionary of Birds*, we  
394 determined where they were born from other publicly available sources, such as *curriculum*  
395 *vitae* available online or *In Memorias* published in society journals.

## 396 **Author metrics**

397 We compiled author data from the publication of each species description. We recorded the  
398 number of authors on each publication and each author's institutional affiliation. For authors with  
399 more than one affiliation listed, we used their first institution listed for our analyses, as this  
400 institution is given and perceived as having priority. When an author's institutional affiliation was  
401 not included in a species description, which is the case for some publications earlier in the  
402 dataset, we inferred their institutional affiliation at the time of publication (when possible) from  
403 other publicly available sources, such as *In Memorias*.

404 We inferred an author's country of origin based on where they were born or where they received  
405 an undergraduate education, which we compiled from publicly available sources, such as *In*  
406 *Memorias*, personal websites, *curriculum vitae*, etc. Our country of origin metric is intended to  
407 capture: (1) the place where an individual received their formative education, and (2) the  
408 academic conventions under which they were trained. We defined an author's country of origin  
409 as the country where they were born (61% of authors), but when this information was  
410 unavailable, we used the country of their undergraduate institution when available (14% of  
411 authors). This combined approach helps us increase coverage, and when both data types were  
412 available for an author (34% of authors), the two metrics show 93% congruence.

## 413 **Statistical analysis**

414 We assess changes in authorship patterns through time using simple linear regressions (Figure  
415 1B and Figure 2A-D), logistic regressions (Figure 2E), and Poisson regressions (Figure 2F),  
416 with year as a single predictor variable. We analyzed if eponym patterns (local honoree vs. non-  
417 local honoree) were significantly predicted by the authors' country of origin (local vs. non-local)  
418 using logistic regressions, with year as a fixed effect (Figure 3). All analyses were conducted in  
419 R v3.6.2 (R Core Team 2013).

## 420 **LAND ACKNOWLEDGEMENT**

421 Our ability to write this paper is made possible through institutional access and support enabled  
422 by coercion and theft, and ongoing occupation of indigenous land. In particular, the University of  
423 Michigan and the University of Chicago/Field Museum are situated on the lands of the Council  
424 of the Three Fires – comprised of the Ojibwe, Odawa, and Potawatomi Nations – as well as the  
425 Miami, Ho-Chunk, Menominee, Sac, Fox, Kickapoo, and Illinois Nations. For this reason, we are  
426 complicit in the ongoing oppression of peoples indigenous to and displaced from these  
427 territories. Along with the seizure of lands, our institutions and practices have contributed to the  
428 erasure and oppression of indigenous sovereignty and knowledge. We call for our community  
429 to: (1) reflect on the objectives and impacts of our science, (2) acknowledge and respect  
430 indigenous autonomy and self-determination, and (3) recognize that our objectives are not  
431 justification for the violation of indigenous autonomy and self-determination.

## 432 **ACKNOWLEDGEMENTS**

433 We thank Alvita Akiboh, Alejandra Anchante, Giorgia Auteri, John Bates, Carlos Daniel Cadena,  
434 Susanna Campbell, Claudio Gómez-González, Eric Gulson-Castillo, Constanza de la Fuente  
435 Castro, Michael Lyons, Bruce O'Brien, Diana Macias, Teresa Pegan, Thomas Stewart, K.  
436 Supriya, Armando Valdés-Velásquez, Kristen Wacker, Z Yan Wang, Brian Weeks, Ben Winger,  
437 Christopher Witt, and Marketa Zimova for their discussions and feedback on the manuscript.

## 438 **LINK TO SUPPLEMENT**

439 Versión del manuscrito en español (Spanish language version of manuscript)  
440 <https://drive.google.com/file/d/1iloVAaqUznEOoWqejXfFclGtf9-TnbUt/view?usp=sharing>

**DEFINITIONS BOX:** Definitions of terms, and how we use terms in the text.

**country of origin** - The country where an author was born and/or where they received an undergraduate education. This metric is intended to capture where an individual received their formative education, and the academic conventions under which they were trained.

**eponym** - a name (in this case, the scientific name of organisms) that “commemorates a real person or a mythological or fictional character” (Jobling 2010).

**global North/global South** - We classified countries and island regions as either *global North* or *global South* based on the United Nations classifications for “developed” and “developing” regions with “developed” corresponding to *global North* and “developing” corresponding to the *global South*. These terms are not strict geographical categorizations of the world but “based on economic inequalities which happens to have some cartographic continuity” (Rigg 2007). Countries such as Australia and New Zealand, for example, are considered as part of the global North. The North/South designations are associated with the Brandt report (1980) which argued that North/South is broadly synonymous with rich/poor and developed/developing, “although neither is a uniform or permanent grouping” (Brandt 1980).

**imperialism** - The ideology and practice of domination over the territories of sovereign peoples. “By the late nineteenth century, *imperialism* [was] used to describe the development or maintenance of power (“hegemony”) of one country over another through economic, diplomatic, and cultural domination even in the absence of direct colonial occupation” (Young 2015).

**Indigenous science** - The science of a local culture and society (Ogawa 1995). In contrast to Western science (which is rooted in European culture), *Indigenous science* is not rooted in one cultural background. We do not use the term *Indigenous science* to imply a shared ontology or history among indigenous cultures, but rather, to refer to the concept of science and knowledge production that is rooted in local culture and society.

**metropole** - The central territory of a colonial state (i.e. the colonizing sovereign state). For example, the U.S. is the *metropole* of Puerto Rico and Guam. Great Britain, Spain, and Portugal are the former *metropoles* for much of the Americas.

**(settler) colonialism** - “...a specific mode of domination where a community of exogenous settlers permanently displace to a new locale, eliminate or displace indigenous populations and sovereignties, and constitute an autonomous political body.” (Veracini 2010). While our study focuses primarily on imperial dynamics, imperialism and colonialism are closely tied.

**type locality** - The country where a species is described from.

**Western science** - A system of knowledge-production that rose to prominence in the 17th and 18th centuries as part of European empire building, and is currently a dominant form of knowledge production globally (Medin and Bang 2014). *Western science* is rooted in ancient Greek philosophy and science, although its foundations are heavily influenced by a broader range of intellectual traditions – such as those in central Asia, as well as Babylonian and Islamic science (Lindberg 2007, Ragep 2009).



441     **REFERENCES**

- 442     Ahmed, S. (2017). *Living a Feminist Life*. Duke University Press.
- 443     Álvarez, L. & Coolsaet, B. (2020). Decolonizing Environmental Justice Studies: A Latin  
444     American Perspective. *Capitalism Nature Socialism* 31(2), 50-69.
- 445     Alves, M. (2020). The Natural Fallacy in a Post-Truth era: A perspective on the natural sciences'  
446     permeability to values. *EMBO reports*, 21(2), e49859.
- 447     Atran, S. (1998). Folk biology and the anthropology of science: Cognitive universals and cultural  
448     particulars. *Behavioral and brain sciences*, 21(4), 547-569.
- 449     Beolens, B., Watkins, M., & Grayson, M. (2020). *The eponym dictionary of birds*. Bloomsbury  
450     Publishing.
- 451     Berlin, B. (2014). *Ethnobiological classification: Principles of categorization of plants and*  
452     *animals in traditional societies*. Princeton University Press.
- 453     Berrey, E. C. (2011). Why diversity became orthodox in higher education and how it changed  
454     the meaning of race on campus. *Critical Sociology* 37(5), 573-596.
- 455     Brewer, D. (2018). *Birds New to Science: Fifty Years of Avian Discoveries*. Bloomsbury  
456     Publishing.
- 457     Brown, C. H. (1984). *Language and living things: Uniformities in folk classification and naming*.  
458     Rutgers University Press.
- 459     Brown, W. (2005). *Edgework: Critical Essays on Knowledge and Politics*. Princeton University  
460     Press.
- 461     Bucher, E. H. (1992). The causes of extinction of the passenger pigeon. In *Current ornithology*  
462     (pp. 1-36). Springer, Boston, MA.
- 463     Carter, H. B. (1995). The Royal Society and the voyage of HMS Endeavour 1768-71. *Notes and*  
464     *Records of the Royal Society of London*, 49(2), 245-260.
- 465     Corbera, E., Calvet-Mir, L., Hughes, H., & Paterson, M. (2016). Patterns of authorship in the  
466     IPCC Working Group III report. *Nature Climate Change*, 6(1), 94-99.
- 467     Coccia, M. & Bozeman, B. (2016). Allometric models to measure and analyze the evolution of  
468     international research collaboration. *Scientometrics* 108, 1065-1084.

- 469 Cronon, W. (2009). *Nature's metropolis: Chicago and the Great West*. WW Norton & Company.
- 470 Darwin, C. (1859). *On the origin of species by means of natural selection, or, the preservation of*  
471 *favoured races in the struggle for life*. London: J. Murray.
- 472 de Sousa Santos, B. (2018). *The end of the cognitive empire: The coming of age of*  
473 *epistemologies of the South*. Duke University Press.
- 474 de Vos, A. (2020). The Problem of 'Colonial Science'. *Scientific American*. Available at  
475 <https://www.scientificamerican.com/article/the-problem-of-colonial-science/>
- 476 Deb Roy, R. (2013). Quinine, mosquitoes and empire: reassembling malaria in British India,  
477 1890–1910. *South Asian history and culture*, 4(1), 65-86.
- 478 Deb Roy, R. (2018). Decolonise science – time to end another imperial era. *The Conversation*.  
479 Available at [https://theconversation.com/decolonise-science-time-to-end-another-imperial-era-](https://theconversation.com/decolonise-science-time-to-end-another-imperial-era-89189)  
480 [89189](https://theconversation.com/decolonise-science-time-to-end-another-imperial-era-89189)
- 481 Diamond, J. (2002). Evolution, consequences and future of plant and animal domestication.  
482 *Nature*, 418(6898), 700-707.
- 483 Espin, J., Palmas, S., Carrasco-Rueda, F., Riemer, K., Allen, P.E., Berkebile, N., Hecht, K.A.,  
484 Kastner-Wilcox, K., Núñez-Regueiro, M.M., Prince, C. and Rios, C. (2017). A persistent lack of  
485 international representation on editorial boards in environmental biology. *PLoS biology*, 15(12),  
486 p.e2002760.
- 487 Frickel, S., & Moore, K. (Eds.). (2006). *The new political sociology of science: Institutions,*  
488 *networks, and power*. Univ of Wisconsin Press.
- 489 Galeano, E. (1971). *Las Venas Abiertas de América Latina*. siglo xxi editores, s. a. de c. v.
- 490 Grosfoguel, R. (2013). The Structures of Knowledge in Westernized Universities: Epistemic  
491 Racism/Sexism and the Four Genocides/Epistemicides of the Long 16th Century. *Human*  
492 *Architecture: Journal of the Sociology of Self-Knowledge* 11(1): 8. Available at  
493 <http://scholarworks.umb.edu/humanarchitecture/vol11/iss1/8>
- 494 Harding, S. (1992). After the neutrality ideal: Science, politics, and "strong objectivity". *Social*  
495 *research*, 567-587.
- 496 HBW and BirdLife International (2019) *Handbook of the Birds of the World and BirdLife*  
497 *International digital checklist of the birds of the world*. Version 4. Available at

- 498 <http://datazone.birdlife.org/userfiles/file/Species/Taxonomy/HBW->  
499 [BirdLife\\_Checklist\\_v4\\_Dec19.zip](#)
- 500 Henderson, L. & Herring, C. (2013). Does critical diversity pay in higher education? Race,  
501 gender, and departmental rankings. *Politics, Groups, and Identities* 1(3): 299-310.
- 502 Henry, F., Dua, E., Kobayashi, A., James, C., Li, P., Ramos, H., & Smith, M. S. (2017). Race,  
503 racialization, and indigeneity in Canadian universities. *Race, Ethnicity and Education* 20(3), 300-  
504 314.
- 505 Iwasaki, A. (2019). Why we need to increase diversity in the immunology research community.  
506 *Nature Immunology* 20, 1085-1088.
- 507 Jobling, J. A. (2010). Helm dictionary of scientific bird names. A&C Black.
- 508 Jordan, C., Mount, G. E., & Parker, K. P. (2018). “A disgrace to all slave-holders”: The  
509 University of Chicago’s Founding Ties to Slavery and the Path to Reparations. *The Journal of*  
510 *African American History*, 103(12), 163-178.
- 511 Kean, S. (2019). Historians expose early scientists’ debt to the slave trade. *Science*. Available  
512 at [https://www.sciencemag.org/news/2019/04/historians-expose-early-scientists-debt-slave-](https://www.sciencemag.org/news/2019/04/historians-expose-early-scientists-debt-slave-trade)  
513 [trade](#)
- 514 Khan, M. S., Lakha, F., Tan, M. M. J., Singh, S. R., Quek, R. Y. C., Han, E., Tan, S. M.,  
515 Haldane, V., Gea-Sánchez, M., LegidoQuigley, H. (2019). More talk than action: Gender and  
516 ethnic diversity in leading public health universities. *The Lancet* 393(10171), 594-600.
- 517 Latour, B., & Woolgar, S. (1979). *Laboratory life: The construction of scientific facts*. Princeton  
518 University Press.
- 519 Lindberg, D. C. (2007). *The beginnings of Western science: The European scientific tradition in*  
520 *philosophical, religious, and institutional context, prehistory to AD 1450*. University of Chicago  
521 Press. Second edition.
- 522 Linnaeus, C. (1735). *Systema naturae, sive regna tria naturae systematice proposita per*  
523 *classes, ordines, genera, & species*. Lugduni Batavorum.
- 524 Linnaeus, C. (1758). *Systema naturae per regna tria naturae :secundum classes, ordines,*  
525 *genera, species, cum characteribus, differentiis, synonymis, locis* (10th ed.). Laurentii Salvii:  
526 Stockholm.
- 527 MacKenzie, J. M. (Ed.). (1990). *Imperialism and the natural world*. Manchester University Press.

- 528 Mace, G. M., & Lande, R. (1991). Assessing extinction threats: toward a reevaluation of IUCN  
529 threatened species categories. *Conservation biology*, 5(2), 148-157.
- 530 Maile, D. (2015). Science, Time, and Mauna a Wākea: The Thirty-Meter Telescope's Capitalist-  
531 Colonialist Violence. *The Red Nation*. Available at [https://therednation.org/2015/05/13/science-](https://therednation.org/2015/05/13/science-time-and-mauna-a-wakea-the-thirty-meter-telescopes-capitalist-colonialist-violence-an-essay-in-two-parts/)  
532 [time-and-mauna-a-wakea-the-thirty-meter-telescopes-capitalist-colonialist-violence-an-essay-in-](https://therednation.org/2015/05/13/science-time-and-mauna-a-wakea-the-thirty-meter-telescopes-capitalist-colonialist-violence-an-essay-in-two-parts/)  
533 [two-parts/](https://therednation.org/2015/05/13/science-time-and-mauna-a-wakea-the-thirty-meter-telescopes-capitalist-colonialist-violence-an-essay-in-two-parts/)
- 534 Mammides, C., Goodale, U.M., Corlett, R.T., Chen, J., Bawa, K.S., Hariya, H., Jarrad, F.,  
535 Primack, R.B., Ewing, H., Xia, X. and Goodale, E. (2016). Increasing geographic diversity in the  
536 international conservation literature: A stalled process?. *Biological Conservation*, 198, pp.78-83.
- 537 Manathunga, C. (2020). Decolonising higher education: creating space for Southern sociologies  
538 of emergence. *SOTL in the South* 4(1): 4-25.
- 539 Medin, D. L., & Bang, M. (2014). *Who's asking?: Native science, western science, and science*  
540 *education*. MIT Press.
- 541 Meneghini, R., Packer, A. L., & Nassi-Calo, L. (2008). Articles by Latin American authors in  
542 prestigious journals have fewer citations. *PLoS One*, 3(11), e3804.
- 543 Mervis, J. (2016). NSF makes new bid to boost diversity. *Science* 351, 6277.
- 544 Moncrieff, A. E., Johnson, O., Lane, D. F., Beck, J. R., Angulo, F., & Fagan, J. (2018). A new  
545 species of antbird (Passeriformes: Thamnophilidae) from the Cordillera Azul, San Martín, Peru.  
546 *The Auk: Ornithological Advances*, 135(1), 114-126.
- 547 Mori, A. S., Qian, S., & Tatsumi, S. (2015). Academic inequality through the lens of community  
548 ecology: a meta-analysis. *PeerJ*, 3, e1457.
- 549 Myers, N., Mittermeier, R. A., Mittermeier, C. G., Da Fonseca, G. A., & Kent, J. (2000).  
550 Biodiversity hotspots for conservation priorities. *Nature*, 403(6772), 853.
- 551 Perrota, D. & Alonso, M. (2020). Cross-National Research: Partnerships in International  
552 Relations: A Study of Research Groups' Practices of MERCOSUR-- Re-envisioning Scholarly  
553 Activities Beyond the Global North-Global South Divide. *Journal of Studies in International*  
554 *Education* 24(1): 79-96.
- 555 Penders, B., and Shaw, D. M. (2020). Civil disobedience in scientific authorship: Resistance and  
556 insubordination in science. *Accountability in Research* 1-25.

- 557 Prescod-Weinstein, C. (2015). Intersectionality as a Blueprint for Postcolonial Scientific  
558 Community Building. Medium. Available at [https://medium.com/@chanda/intersectionality-as-a-](https://medium.com/@chanda/intersectionality-as-a-blueprint-for-postcolonialscientific-community-building-7e795d09225a#.6ijse2h1r)  
559 [blueprint-for-postcolonialscientific-community-building-7e795d09225a#.6ijse2h1r](https://medium.com/@chanda/intersectionality-as-a-blueprint-for-postcolonialscientific-community-building-7e795d09225a#.6ijse2h1r)
- 560 Proctor, R. N., & Proctor, R. (1991). Value-free science?: Purity and power in modern  
561 knowledge. Harvard University Press.
- 562 Quintero Toro, C. (2012). Birds of empire, birds of nation: A history of science, economy, and  
563 conservation in United States-Colombia relations. Ediciones Uniandes-Universidad de los  
564 Andes.
- 565 R Core Team. R: A language and environment for statistical computing. (2013).
- 566 Rainforest Trust, New Bird Species Named for E.O. Wilson, “Father of Biodiversity” and  
567 Rainforest Trust Board Member. [https://www.rainforesttrust.org/new-bird-species-named-father-](https://www.rainforesttrust.org/new-bird-species-named-father-biodiversity-rainforest-trust-board-member-dr-e-o-wilson)  
568 [biodiversity-rainforest-trust-board-member-dr-e-o-wilson](https://www.rainforesttrust.org/new-bird-species-named-father-biodiversity-rainforest-trust-board-member-dr-e-o-wilson). Accessed 1 May 2020.
- 569 Ragep, F. J. (2009). David C. Lindberg. The Beginnings of Western Science: The European  
570 Scientific Tradition in Philosophical, Religious, and Institutional Context, Prehistory to ad 1450.  
571 xvi+ 488 pp., figs., bibl., index. Chicago/London: University of Chicago Press, 2007.
- 572 Richardson, W. J. (2018). Understanding Eurocentrism as a structural problem of undone  
573 science. In G. K. Bhambra, D. Gebrial, and K. Nişancıoğlu (Eds.), *Decolonising the University*  
574 (pp. 231-247). London, Pluto Press.
- 575 Rigg, J. (2007). *An everyday geography of the global south*. Routledge.
- 576 Robinson, S.K., 2019. Bird niches in human culture and why they matter. *Proceedings of the*  
577 *National Academy of Sciences*, 116(22), pp.10620-10622.
- 578 Said, E. W. (1979). *Orientalism*. Vintage.
- 579 Saini, A. (2019). *Superior: the return of race science*. Beacon Press.
- 580 Schuetz, J. G., & Johnston, A. (2019). Characterizing the cultural niches of North American  
581 birds. *Proceedings of the National Academy of Sciences*, 116(22), 10868-10873.
- 582 Shen, H. W., & Barabási, A. L. (2014). Collective credit allocation in science. *Proceedings of the*  
583 *National Academy of Sciences*, 111(34), 12325-12330.
- 584 Sheth, M. J. (2019). Grappling with racism as foundational practice of science teaching. *Science*  
585 *Education*, 103(1), 37-60.

- 586 The Malaria Expedition to West Africa (1900). *Science*, 11(262), 36-37.
- 587 Tschardtke, T., Hochberg, M. E., Rand, T. A., Resh, V. H., & Krauss, J. (2007). Author  
588 sequence and credit for contributions in multiauthored publications. *PLoS biology*, 5(1).
- 589 Valantine, H. A., Lund, P. K., & Gammie, A. E. (2016). From the NIH: A systems approach to  
590 increasing the diversity of the biomedical research workforce. *CBE - Life Sciences Education*  
591 15(fe4), 1-5.
- 592 Veracini, L. (2010). *Settler colonialism*. Houndmills, UK: Palgrave Macmillan, 10,  
593 9780230299191.
- 594 Ward-Fear, G., Pauly, G. B., Vendetti, J. E., & Shine, R. (2020). Authorship Protocols Must  
595 Change to Credit Citizen Scientists. *Trends in Ecology & Evolution* 35(3).
- 596 Weinstein, B. (1983). *The Amazon rubber boom, 1850-1920*. Stanford University Press.
- 597 Wynn-Grant, R. (2019). Available at  
598 <https://threadreaderapp.com/thread/1116076320188981250.html>
